# Supplementary material for: Severe Acute Liver Injury After Hepatotoxic Medication Initiation in Real-World Data
Source: PubMed Central journal article supplement (PMC11197444; doi:10.1001/jamainternmed.2024.1836), 2024-06-24
Supplement: jamainternmed-e241836-s002.pdf [file jamainternmed-e241836-s002.pdf]

## Data Sharing Statement

Torgersen. Severe Acute Liver Injury After Hepatotoxic Medication Initiation in Real-World Data. *JAMA Intern Med*. Published June 24, 2024. doi:10.1001/jamainternmed.2024.1836

### Data

**Data available:** No

### Additional Information

**Explanation for why data not available:** Due to US Department of Veterans Affairs (VA) regulations and our ethics agreements, the analytic data sets used for this study are not permitted to leave the VA without a Data Use Agreement. This limitation is consistent with other studies based on VA data. However, VA data are made freely available to researchers with an approved VA study protocol. For more information, please visit <https://www.virec.research.va.gov> or contact the VA Information Resource Center (VIReC) at [VIReC@va.gov](mailto:VIReC@va.gov).
